# Supplementary material
Source: PubMed Central journal article supplement (PMC4866808)
Supplement: NIHMS774664-supplement-01.pdf [file NIHMS774664-supplement-01.pdf]

1 **Supplemental Table and Figures**

2

3

4

5

6

7

8

9

10

11

12

13

14

15

16

17

18

19

20

|      | CaMKII | PV | VIP | SST |
|------|--------|----|-----|-----|
| MGv  | ✓      | ✓  | ✓   | ✓   |
| MGd  | ✓      | ✓  | ✓   | ✓   |
| SGN  | ✓      | ✓  | ✓   | ✓   |
| MGm  | ✓      | ✓  | ✓   | ✓   |
| POL  | ✓      | ✓  |     | ✓   |
| ZI   | ✓      | ✓  | ✓   | ✓   |
| SIn  | ✓      | ✓  | ✓   | ✓   |
| HY   | ✓      | ✓  |     | ✓   |
| LA   | ✓      | ✓  |     | ✓   |
| AUDd | ✓      | ✓  | ✓   | ✓   |
| AUDv | ✓      | ✓  | ✓   | ✓   |
| PTLp | ✓      | ✓  |     | ✓   |
| SS   | ✓      | ✓  | ✓   | ✓   |
| RSP  | ✓      | ✓  |     | ✓   |
| VIS  | ✓      | ✓  |     | ✓   |
| OFC  | ✓      | ✓  |     | ✓   |
| M1   | ✓      | ✓  |     | ✓   |
| M2   | ✓      | ✓  | ✓   | ✓   |
| Cg   | ✓      | ✓  |     |     |
| CLA  | ✓      | ✓  | ✓   | ✓   |

21

22 **Table S1 – refers to Figure 1. Afferents to ACTx Cell Types**

23 Brain regions with GFP<sup>+</sup> neurons providing input to CaMKII<sup>+</sup>, PV<sup>+</sup>, SST<sup>+</sup>, or VIP<sup>+</sup> neurons. Blue colors  
 24 indicate thalamic regions; orange colors indicate subthalamic regions; grey colors indicate cortical  
 25 regions. Abbreviations of brain regions: medial geniculate body, ventral part (MGv), medial geniculate  
 26 body, dorsal part (MGd), supragenulate nucleus (SGN), medial geniculate body, medial part (MGm),  
 27 posterior limiting nucleus of the thalamus (POL), zona incerta (ZI), substantia innominata (SIn),  
 28 hypothalamus (HY), lateral amygdala (LA), auditory cortex, dorsal part (AUDd), auditory cortex, ventral  
 29 part (AUDv), posterior parietal association areas (PTLp), somatosensory cortex (SS), retrosplenial cortex  
 30 (RSP), visual cortex (VIS), orbitofrontal cortex (OFC), primary motor cortex (M1), secondary motor cortex  
 31 (M2), cingulate cortex (Cg), claustrum (CLA).

32

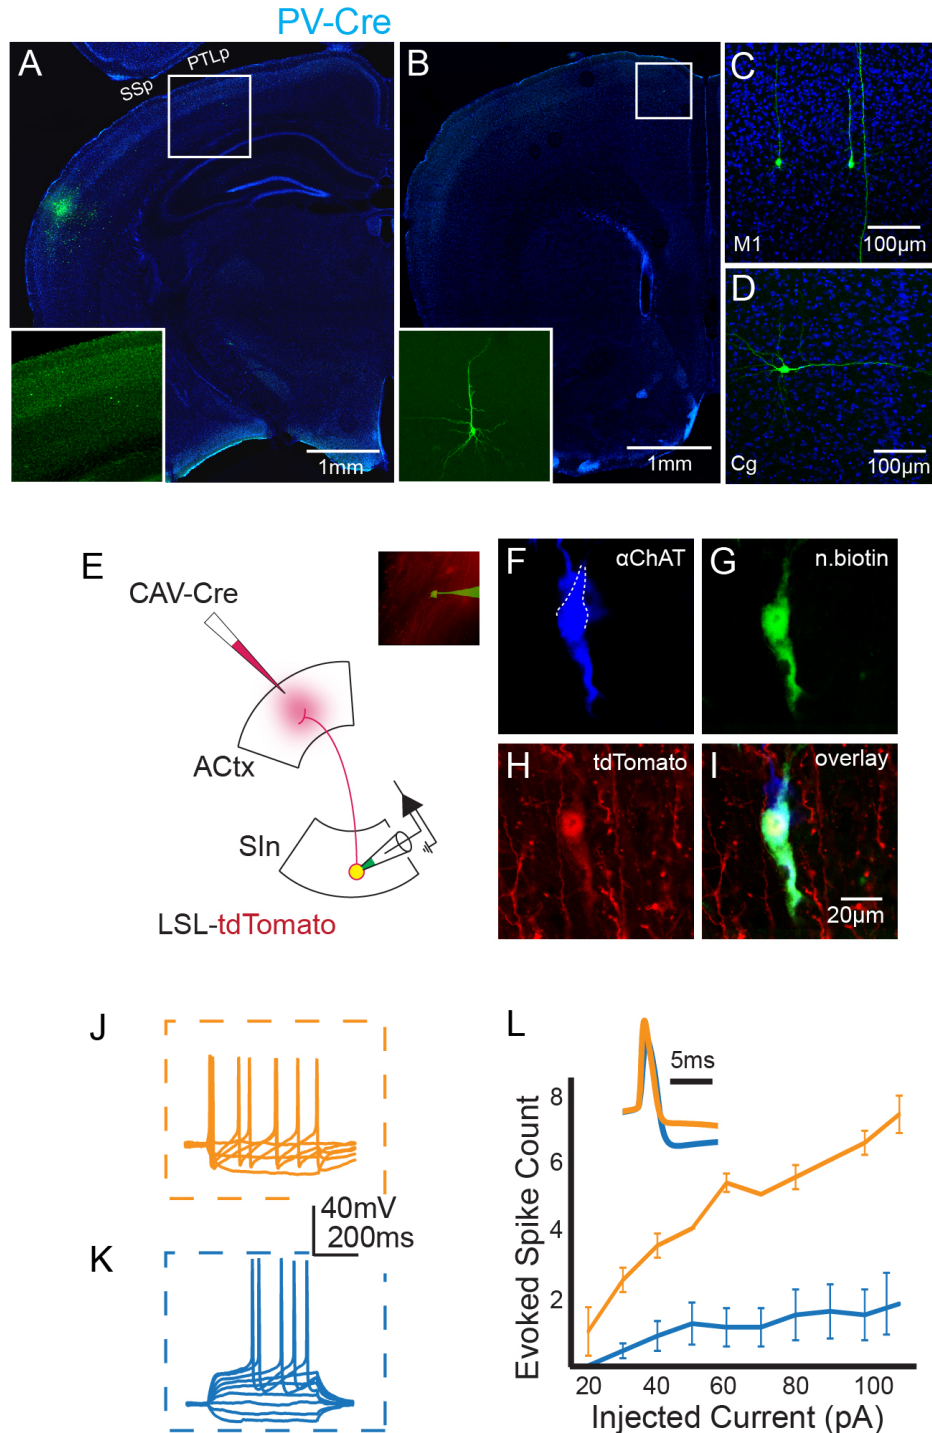

33

34 **Figure S1 – refers to Figure 1. Afferents to ACtx Cell Types and Electrophysiological Properties of**  
 35 **Sln<sub>ACh</sub> Neurons**

36 (A) Neurons presynaptic to auditory cortical PV<sup>+</sup> neurons. The boxed region corresponds to the inset,  
 37 depicting neuronal labeling near SS and PTLp. The inset is shown without DAPI staining for clarity. (B)  
 38 GFP<sup>+</sup> neuron in M2. The boxed region corresponds to the inset. (C) GFP<sup>+</sup> neurons in M1. (D) GFP<sup>+</sup>  
 39 neurons in Cg. (E) Strategy for recording from Sln<sub>ACh</sub> neurons. CAV-Cre was injected into ACtx of Ai14

40 mice, resulting in tdTomato labeling of its afferents. Whole-cell recordings were made from tdTomato<sup>+</sup>  
41 neurons in SIn (inset). (F-I) Following whole-cell recording, sections were immunostained for ChAT (F),  
42 and targeted tdTomato<sup>+</sup> neurons were visualized (G,H), confirming their cholinergic phenotype (I). (J-L)  
43 Neurons fell into one of two electrophysiological classes: “early spiking” neurons (J) or “late spiking”  
44 neurons (K)(Unal et al., 2010). These classes additionally segregated by their action potential responses  
45 to intracellular current injection (L), as well as action potential shape (inset).  
46

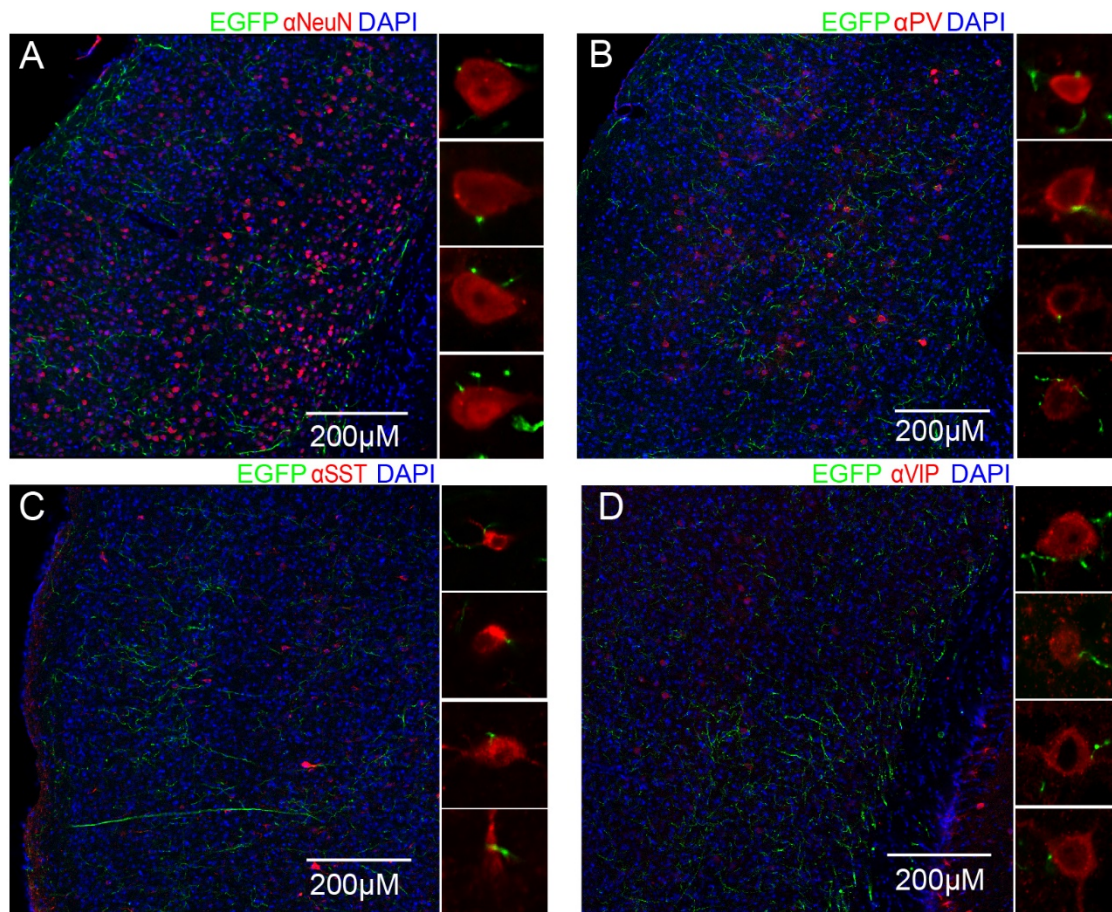

47  
48 **Figure S2 – refers to Figure 1. SIn<sub>ACh</sub> Neurons Form Close Appositions with Neurons in ACTx**  
49 (A) SIn<sub>ACh</sub> axons in ACTx, made to express GFP by injecting AAV-FLEX-GFP into SIn of ChAT-Cre  
50 mice. In red are neurons immunostained for NeuN. The panels to the right show close appositions  
51 between GFP<sup>+</sup> SIn<sub>ACh</sub> axons and NeuN<sup>+</sup> neurons. Images are single optical sections of 1 or fewer AU  
52 taken with a 100x 1.4 NA oil immersion objective. DAPI is blue. (B-D) GFP<sup>+</sup> SIn<sub>ACh</sub> axons form close  
53 appositions with cell bodies and dendrites of PV<sup>+</sup>, SST<sup>+</sup>, and VIP<sup>+</sup> neurons in ACTx.

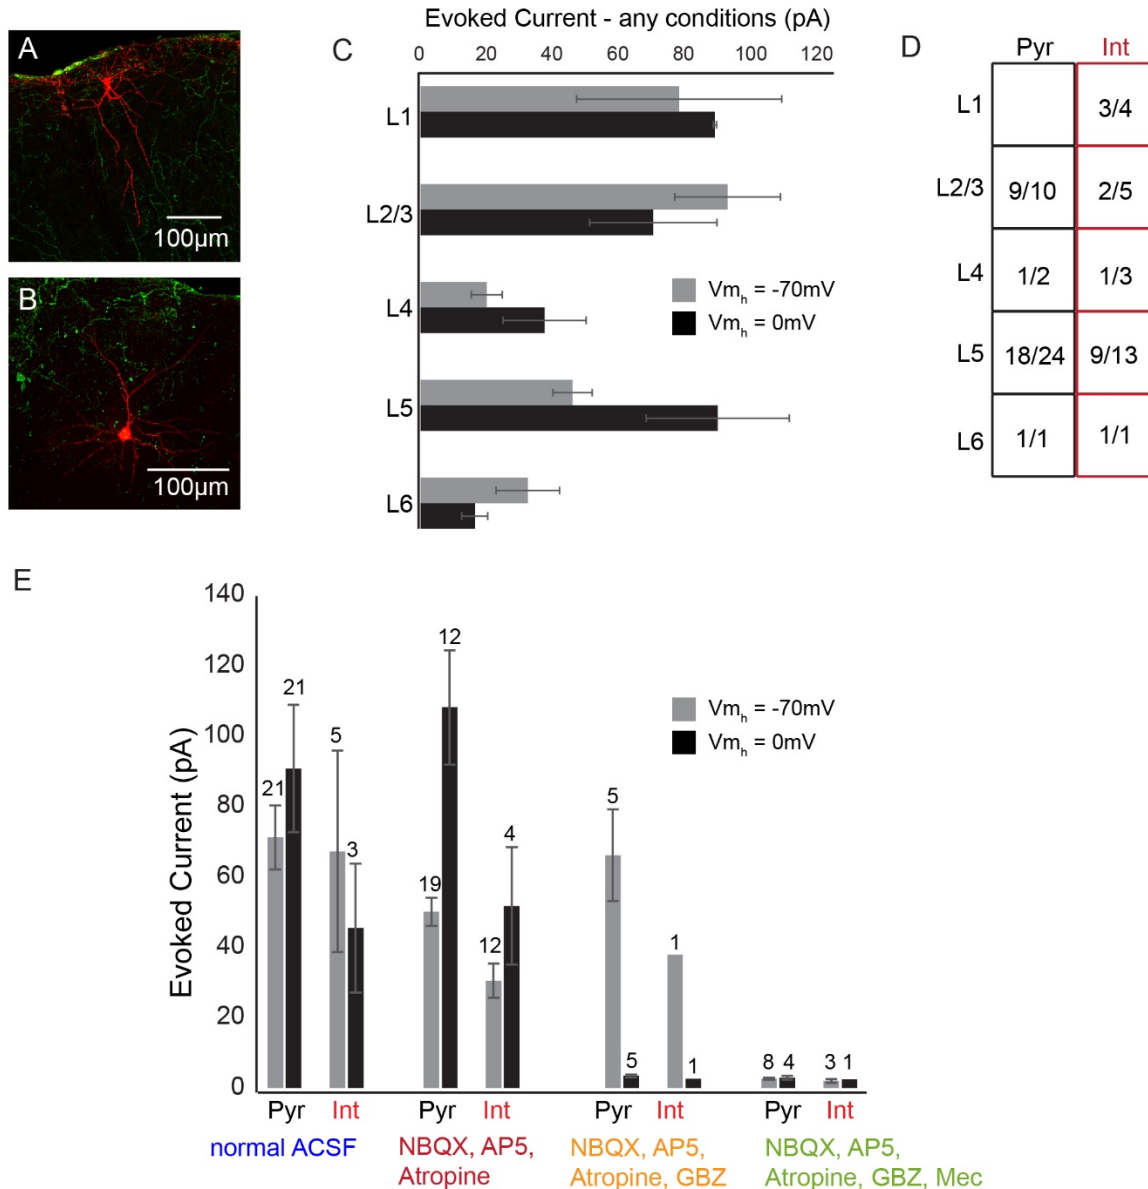

54  
55

56 **Figure S3 – refers to Figure 2. Excitatory and Inhibitory Currents in ACTx Mediated by Stimulation**  
57 **of Sln<sub>ACh</sub> axons.**

58 (A) A confocal micrograph of a L1 interneuron filled with dye and visualized following whole-cell  
59 recording. Sln<sub>ACh</sub> axons expressing ChR2 and GFP (antibody enhanced fluorescence) are in green. (B) A  
60 confocal micrograph of a L2/3 pyramidal neuron filled with dye and visualized following whole-cell  
61 recording. (C) Average excitatory (holding potential at -70 mV) and inhibitory (holding potential at 0 mV)  
62 currents evoked in neurons across all layers of ACTx. (D) The fraction of pyramidal neurons (black  
63 squares) or interneurons (red squares) responsive to stimulation of Sln<sub>ACh</sub> axons, recorded from across  
64 layers. (E) The same data from Figure 2I, separated into pyramidal neurons and interneurons. The  
65 numbers of cells recorded for each condition are indicated above the bars. Values are mean ± SEM.

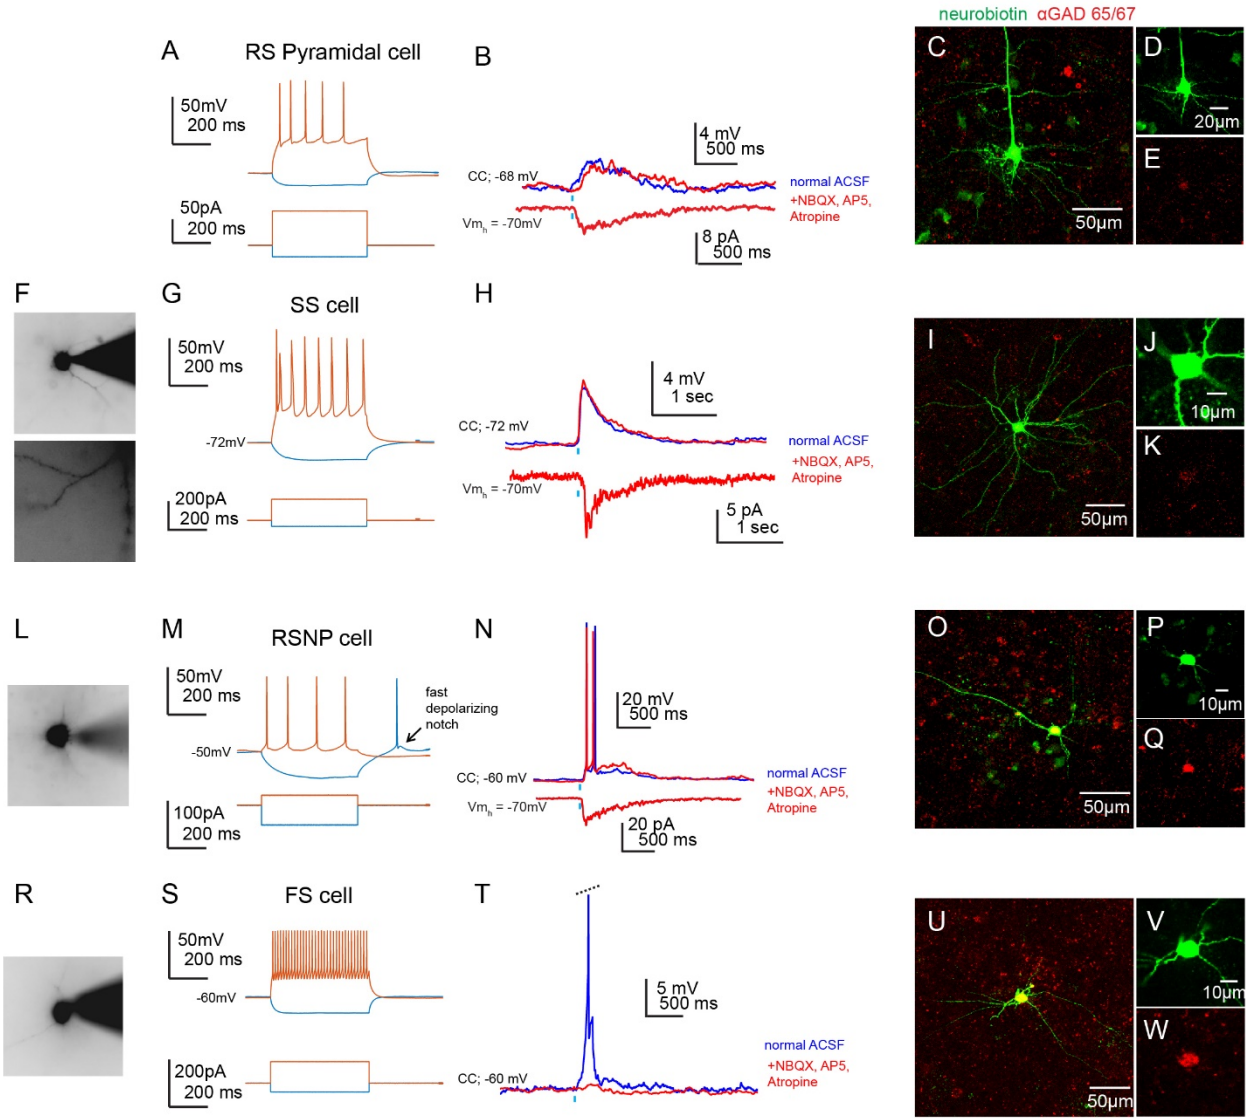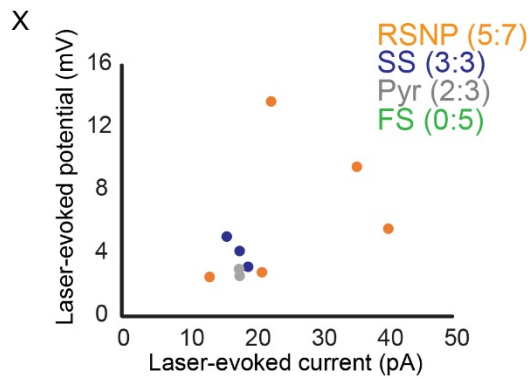

67 **Figure S4 – refers to Figure 2. Recording  $SIn_{ACh}$ -Evoked Activity in Identified Inhibitory and**  
68 **Excitatory Interneurons.**

69 (A) Membrane properties (above) of a pyramidal cell revealed by intracellular current injection (below).  
70 (B) Responses to  $SIn_{ACh}$  stimulation in current clamp configuration (above, resting membrane potential  
71 indicated) and in voltage clamp configuration (below, holding potential indicated). Recordings were made  
72 in nACSF (blue traces) and ACSF containing NBQX, AP5, and atropine (red traces). (C) Confocal Z  
73 stack depicting a pyramidal cell targeted for whole cell physiology (green) and GAD65/67 labeling (red).  
74 (D,E) Single optical sections of the green and red channels from (C). Note the absence of substantial  
75 GAD immunolabeling in (E). (F) A spiny stellate cell filled with fluorescent dye during whole cell recording  
76 (above), and a higher magnification view of spiny dendrites from the same cell (below). (G) Membrane  
77 properties of a spiny stellate cell revealed by intracellular current injection. (H) Responses of a spiny  
78 stellate cell to  $SIn_{ACh}$  stimulation. (I) Confocal Z stack depicting a spiny stellate cell targeted for whole cell  
79 physiology (green) and GAD65/67 labeling (red). (J,K) Single optical sections of the green and red  
80 channels from (I). Note the absence of substantial GAD immunolabeling in (K). (L) A regular spiking  
81 nonpyramidal (RSNP) cell filled with fluorescent dye during whole cell recording. (M) Membrane  
82 properties of a RSNP cell revealed by intracellular current injection. Note the fast depolarizing notch  
83 following an action potential induced by cessation of the hyperpolarizing current pulse. (N) Responses of  
84 a RSNP cell to  $SIn_{ACh}$  stimulation. (O) Confocal Z stack depicting a RSNP cell targeted for whole cell  
85 physiology (green) and GAD65/67 labeling (red). (P,Q) Single optical sections of the green and red  
86 channels from (O). Note the substantial GAD immunolabeling in (Q) colocalizing with the targeted  
87 neuron. (R) A fast spiking (FS) cell filled with fluorescent dye during whole cell recording. (S) Membrane  
88 properties of FS cell revealed by intracellular current injection. (T) Responses of a FS cell to  $SIn_{ACh}$   
89 stimulation. Voltage responses evoked in nACSF were abolished upon application of NBQX, AP5, and  
90 atropine. (U) Confocal Z stack depicting a FS cell targeted for whole cell physiology (green) and  
91 GAD65/67 labeling (red). (V,W) Single optical sections of the green and red channels from (U). Note the  
92 substantial GAD immunolabeling in (W) colocalizing with the targeted neuron. (X) Laser-evoked  
93 excitatory current plotted against laser-evoked depolarizing potential for each responsive neuron, color  
94 coded by neuron type. The inset indicates the cell type, as well as the number of responsive neurons out  
95 of the total number recorded for each cell type.

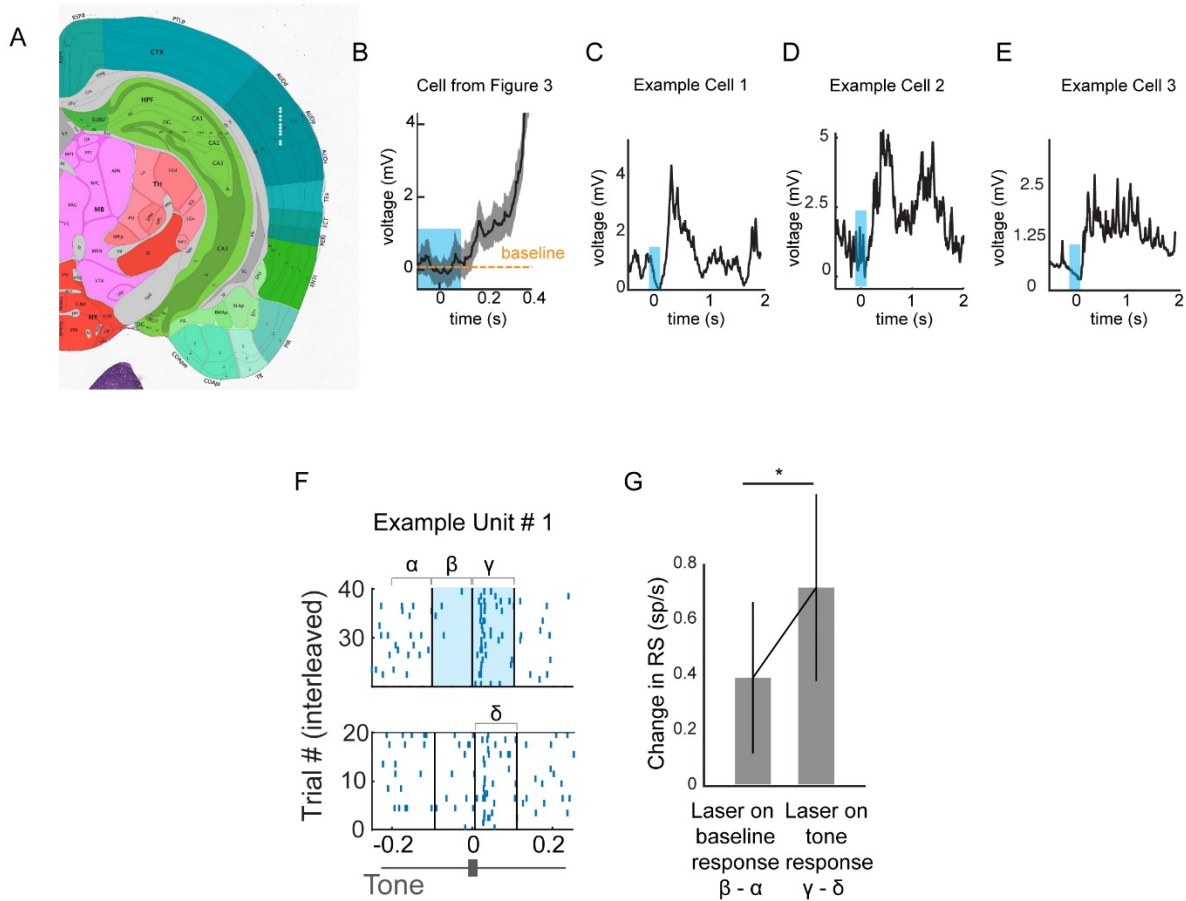

96

97 **Figure S5 – refers to Figures 3 and 4.**

98 (A) Representative coronal section from the Allen Brain Atlas with approximate locations of intracellularly-  
 99 recorded neurons included in Figure 3. Recorded neurons spanned superficial and deep layers. (B) An  
 100 expanded view of the exemplar neuron in Figure 3, depicting the depolarization following optogenetic  
 101 stimulation of  $\text{Sl}_{\text{N}_{\text{ACh}}}$  axons. The mean membrane potential of the baseline period is indicated. (C-E)  
 102 Three additional example neurons' responses to optogenetic stimulation of  $\text{Sl}_{\text{N}_{\text{ACh}}}$  axons, which are  
 103 included in Figure 3. (F) The strategy for determining the relative modulation of baseline firing rate versus  
 104 tone-evoked firing rate in response to optogenetic stimulation of  $\text{Sl}_{\text{N}_{\text{ACh}}}$  axons. (G) The change in  
 105 response strength following optogenetic stimulation of  $\text{Sl}_{\text{N}_{\text{ACh}}}$  axons for baseline and for tone-evoked  
 106 responses. (\* $p < 0.05$ , paired t-test). Values are mean  $\pm$  SEM.

107

108

109

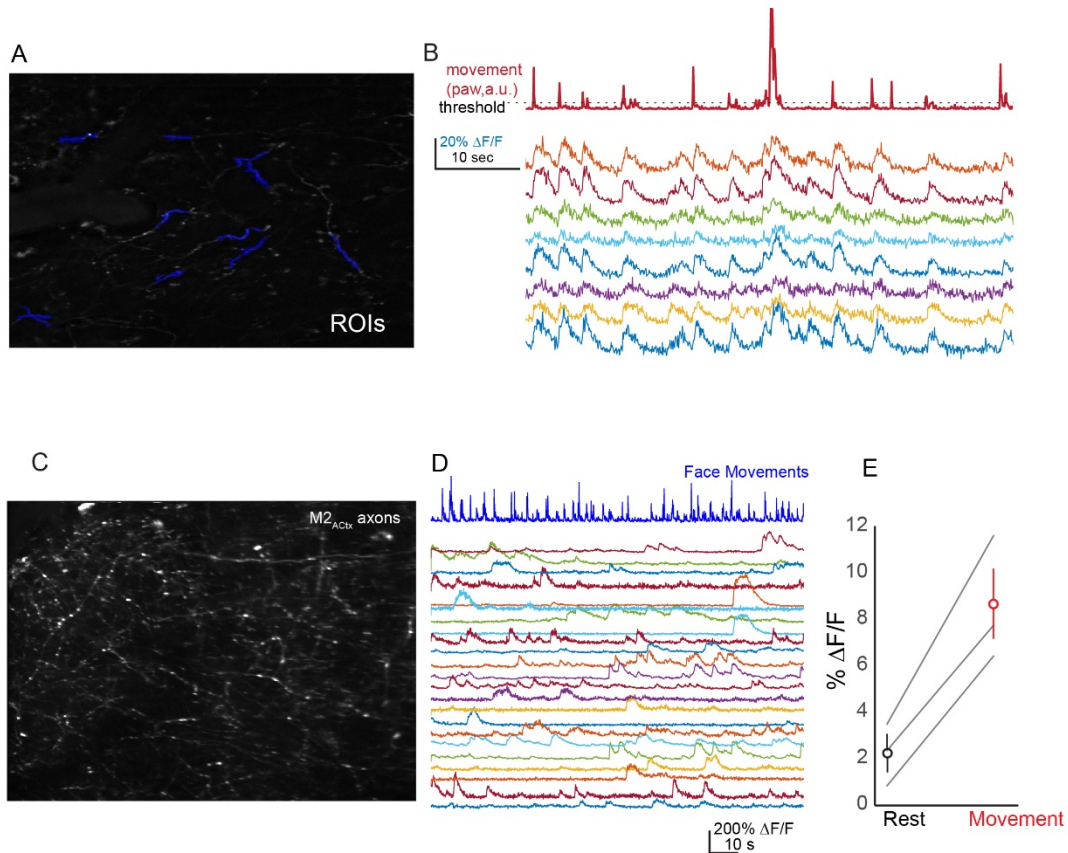

110  
111  
112  
113  
114  
115  
116  
117  
118  
119

**Figure S6 – refers to Figure 5. Two Photon Calcium Imaging of SIn<sub>ACh</sub> and M2<sub>AcTx</sub> Axons**

(A) An average intensity projection of an example field of view from 2p imaging of SIn<sub>ACh</sub> axons in ACtx, with axon segment ROIs marked with blue shading. (B) Activity of several SIn<sub>ACh</sub> axon ROIs in a 2p imaging field of view (multicolored traces below) during an epoch of small movements (above red trace). The threshold for movement is indicated by the dashed line. (C) An average intensity projection of an example field of view from 2p imaging of M2<sub>AcTx</sub> axons. (D) Activity of several M2<sub>AcTx</sub> axon ROIs in a 2p imaging field of view (multicolored traces below) during an epoch of small movements (above blue trace). (E) ΔF/F of M2<sub>AcTx</sub> axons during periods of rest and movement.



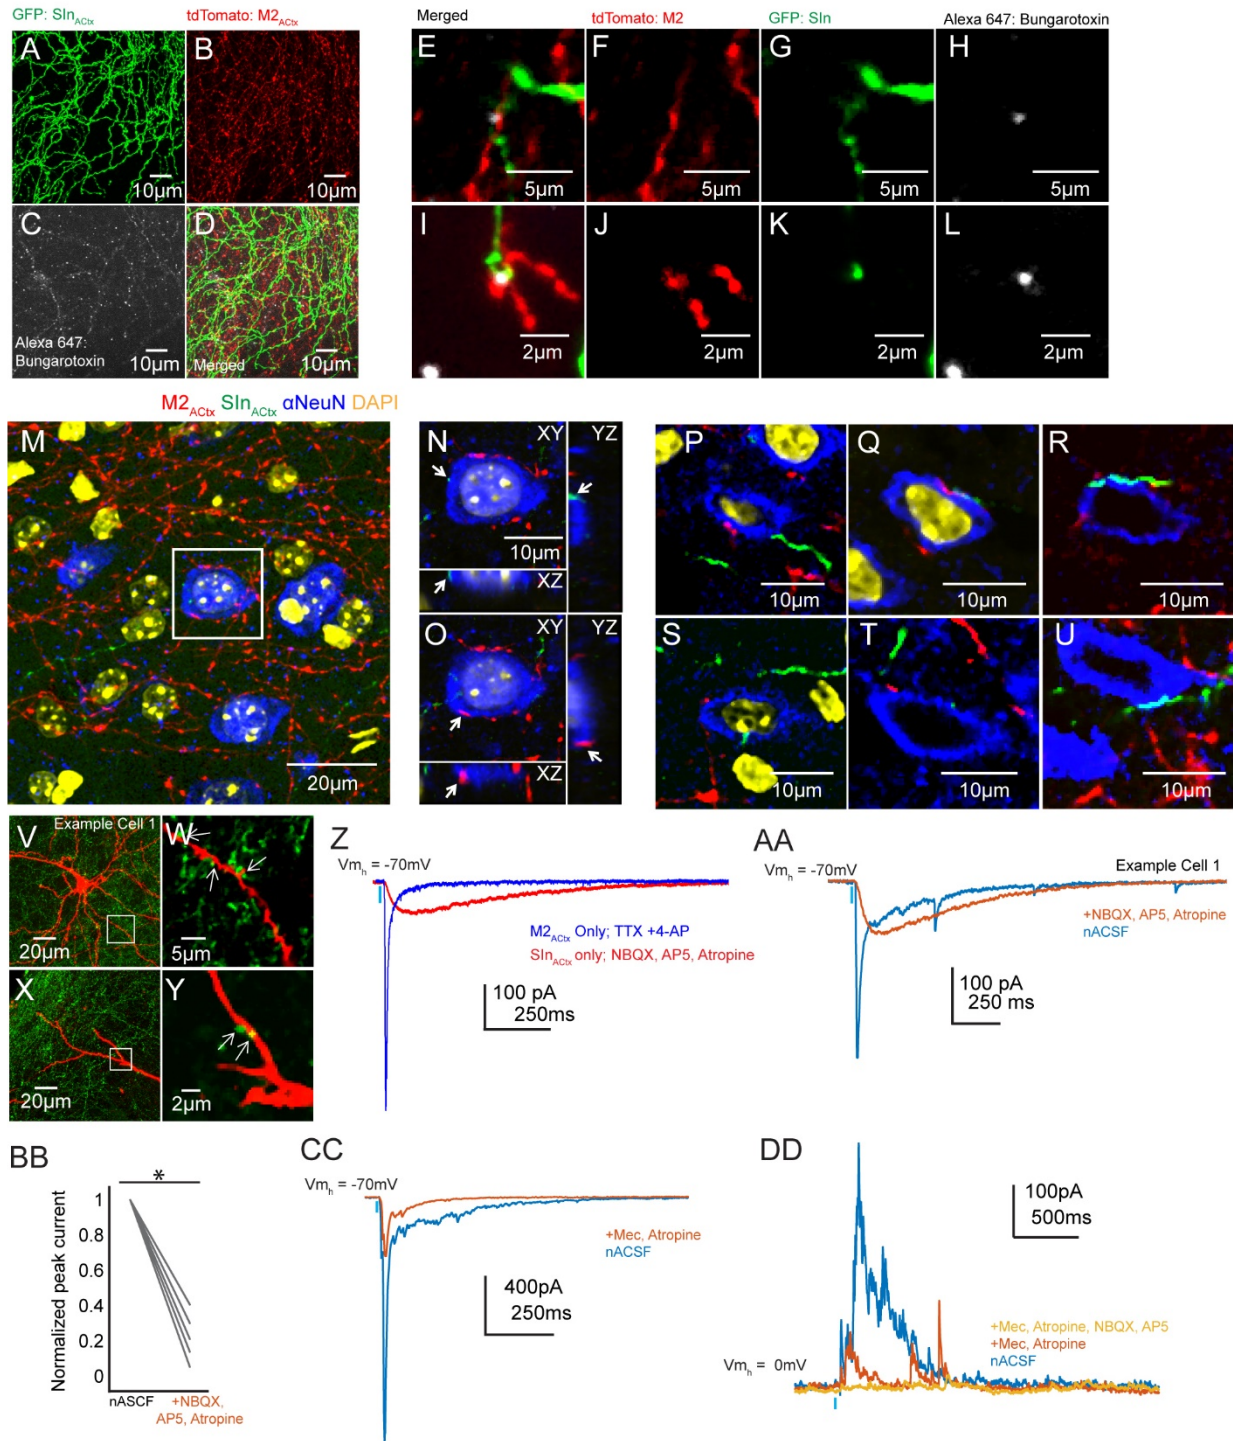

120  
 121  
 122  
 123  
 124  
 125  
 126

**Figure S7 – refers to Figure 7.  $Sn_{ACh}$  and  $M2_{ACtx}$  Synapses Converge on Single Auditory Cortical Neurons**

(A-D) Single fluorescence channels of the same data from Figure 7E. Bungarotoxin Alexa Fluor 647 fluorescence brightness is increased in (C) to highlight the density of labeled nicotinic acetylcholine receptors. (E-L) Single optical sections depicting close appositions (potential presynaptic contacts)

127 between M2 and SIn<sub>ACh</sub> axons in ACTx. The channel colors indicate the same information as in (A-D).  
128 (M) A confocal Z stack of neurons labeled with NeuN (blue) in the vicinity of SIn<sub>ACh</sub> axons (green) and  
129 M2<sub>ACTx</sub> axons (red). DAPI is yellow. (N,O) Single optical sections of the boxed cell from (M). Close  
130 appositions are indicated with arrows. The images labeled YZ and XZ are the orthogonal planes of those  
131 appositions depicted in the XY planes. (P-U) Six more single optical sections of additional cell bodies  
132 labeled with NeuN showing close appositions with M2 and SIn<sub>ACh</sub> axons. No DAPI was used in (R), (T),  
133 or (U). (V-Y) Confocal Z stacks (V,X) and single optical sections (W,Y) showing close appositions  
134 between putative ChR2-expressing M2 and SIn<sub>ACh</sub> boutons and the dendrites of a pyramidal neuron  
135 targeted for whole cell recording. Same cell as in Figure 7J. (Z) An example monosynaptic (ACSF  
136 containing TTX and 4-AP) glutamatergic excitatory current (blue) evoked by stimulation of only M2<sub>ACTx</sub>  
137 axons expressing ChR2 (data from Nelson et al. 2013). An example nicotinic (in NBQX, AP5, and  
138 atropine) excitatory current (red) evoked by stimulation of only SIn<sub>ACh</sub> axons expressing ChR2 (data from  
139 Figure 2). The two traces are aligned at stimulus onset. (AA) A single cell example from experiments in  
140 Figure 7K. (BB) Normalized peak current evoked following stimulation of SIn<sub>ACh</sub> and M2<sub>ACTx</sub> axons in  
141 nACSF and NBQX, AP5, and atropine. Peak excitatory current normalized to nACSF responses:  $0.2263$   
142  $\pm 0.0643$ ,  $p = 2.73 \times 10^{-4}$  (CC) An example cell from experiments similar to those in Figure 7I-L, showing  
143 excitatory currents evoked following stimulation of SIn<sub>ACh</sub> and M2<sub>ACTx</sub> axons, before (blue) and after  
144 (orange) addition of cholinergic transmission blockers. (DD) Same as (CC), but at holding potentials of  
145 0mV to isolate inhibitory currents. ACSF with the addition of NBQX and AP5 was finally included to block  
146 all evoked inhibitory currents (yellow trace).  
147  
148

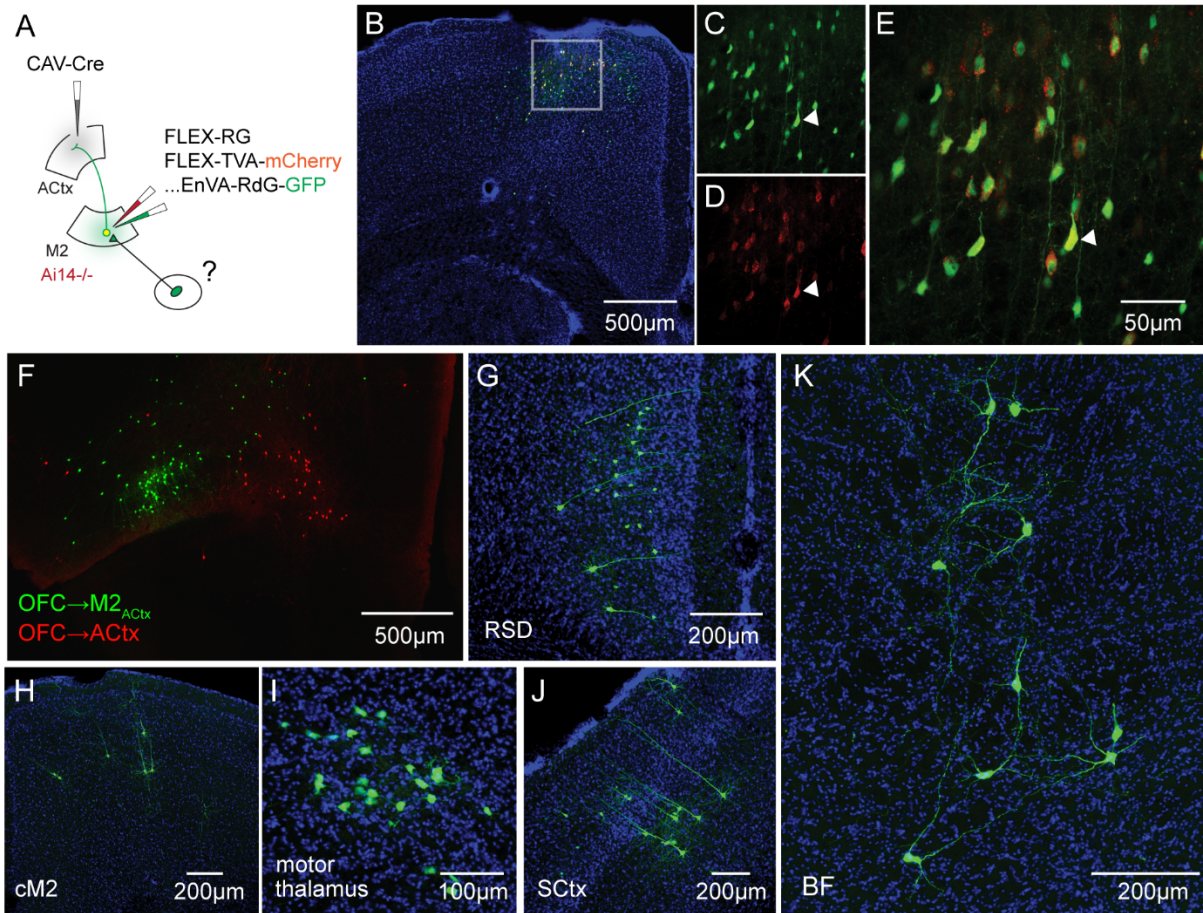

149  
150

151 **Figure S8 – refers to Figure 8. Synaptic Inputs to M2<sub>ACTx</sub> Neurons**

152 (A) Schematic of the experimental strategy. On day 0, AAV-FLEX-RG and AAV-FLEX-TVA.mCherry  
 153 were injected into M2 of wild type mice. Additionally, CAV-Cre was injected into ipsilateral ACtx. For a  
 154 subset of mice, injections were made into Ai14 mice, which resulted in tdTomato labeling of afferents of  
 155 ACtx. On Day 14, EnVA-RdG.GFP is injected into M2, which labeled neurons presynaptic to M2<sub>ACTx</sub> cells  
 156 expressing TVA and RG. (B) GFP and mCherry labeling in M2. DAPI is blue. (C) GFP<sup>+</sup> neurons from  
 157 region outlined in (B). (D) mCherry<sup>+</sup> neurons in the same region. (E) An overlay of (C) and (D). The  
 158 arrowhead indicates one of many GFP<sup>+</sup>mCherry<sup>+</sup> starter neurons. (F) Neurons presynaptic to M2<sub>ACTx</sub>  
 159 neurons (green) and neurons presynaptic to ACtx (red) in orbitofrontal cortex. These two classes of  
 160 projection neurons are largely non-overlapping. (G-K) Neurons presynaptic to M2<sub>ACTx</sub> neurons in  
 161 retrosplenial cortex (G), contralateral M2 (H), motor thalamus (I), somatosensory cortex (J), and rostral  
 162 basal forebrain (K).

163 **Supplemental Experimental Procedures**

164 **Animals**

165 All experimental protocols were approved by Duke University Institutional Animal Care and Use  
166 Committee. Male and female wild-type (C57BL/6) and transgenic (PV-Cre, CaMKII-Cre, SST-Cre, VIP-  
167 Cre, ChAT-Cre, and Ai14) mice were purchased from Jackson Laboratories and housed and bred in an  
168 onsite vivarium. Mice selected for surgical and experimental procedures were kept on a reverse light  
169 cycle.

170

171 **Stereotaxic Viral Injections**

172 Mice aged 1-2 months (for in vitro electrophysiology) or 2-4 months (all other injections) were  
173 anesthetized with isoflurane (1-2% in O<sub>2</sub>) and placed in a stereotaxic holder (Leica). A midline incision  
174 was made to expose the skull, and a craniotomy was made over the injection site. For rabies-based  
175 presynaptic tracing from ACtx, a pipette backfilled with an equal mixture of AAV.1.CAG.FLEX.RG (UNC  
176 Vector Core) and AAV.1.EF1α.FLEX.TVA-mCherry (UNC Vector Core) was angled 30 degrees from  
177 vertical and lowered into the brain. Approximately 150-300 nL of the mixture was pressure-injected into  
178 the center of ACtx over the course of 15 min. For anterograde tracing experiments, 300-400 nL of  
179 AAV.2/1.syn.FLEX.EGFP (Penn Vector Core) was injected into SIn, and 10-20 nL  
180 AAV.2/1.CAG.tdTomato (Penn Vector Core) was injected into the center of M2. For electrophysiological  
181 experiments, approximately 500-700 nL of AAV.2/1.EF1α.DIO.ChR2.GFP (Penn Vector Core) was  
182 injected into SIn. For dual projection optogenetic experiments, 100-150 nL of AAV.2/1.syn.ChR2.EYFP  
183 (Penn Vector Core) was subsequently injected into the center of M2. For calcium imaging experiments,  
184 500-700 nL of AAV.2/1.syn.FLEX.GCaMP6s (University of Pennsylvania Vector Core) was injected into  
185 SIn. To image the activity of M2<sub>ACtx</sub> axons, a total of 100 nL of AAV.2/1.syn.GCaMP6s was injected into  
186 M2 at two locations. For rabies tracing from SIn, 150-300 nL of AAV.1.CAG.FLEX.RG and  
187 AAV.1.EF1α.FLEX.TVA-mCherry was injected into SIn, and 100-200 nL of CAV-Cre (Universitat  
188 Autònoma de Barcelona, Unitat de Producció de Vectors) was subsequently injected into ACtx. Animals  
189 were allowed to recover for 14 days following injection. For rabies tracing experiments, animals  
190 underwent a second surgery, and 500-600 nL of EnVA-RΔG.GFP (Duke University Viral Vector Core)  
191 was injected into the site of TVA and RG expression (ACtx or SIn). Those mice were then allowed to  
192 survive for 7 days before perfusion.

193

194 **Slice Electrophysiology and Photostimulation**

195 Mice were deeply anesthetized with isoflurane and transcardially perfused with an ice-cold carbogenated  
196 sucrose artificial CSF (ACSF) containing the following (in mM): 2.5 KCl, 3.8 MgCl<sub>2</sub>, 0.138 NaH<sub>2</sub>PO<sub>4</sub>, 2.2  
197 NaHCO<sub>3</sub>, 1.98 dextrose, and 81.46 sucrose. The brain was removed, and the rostral pole was glued to  
198 the stage of a vibrating microtome (Leica). 300 μm coronal slices were cut in a bath of ice-cold  
199 carbogenated sucrose ACSF. Slices were incubated for 14 min in a 34°C bath of normal ACSF (nACSF)

200 containing (in mM): 119 NaCl, 2.5 KCl, 1.30 MgCl<sub>2</sub>, 2.5 CaCl<sub>2</sub>, 1.0 NaH<sub>2</sub>PO<sub>4</sub>, 26.2 NaHCO<sub>3</sub>, and 11.0  
201 dextrose. Slices were then allowed to gradually reach room temperature, where they remained for the  
202 duration of the experiment. Patch electrodes (2–6 MΩ) were filled with internal solution of 5 mM QX-314,  
203 2 mM ATP Mg salt, 0.3 mM GTP Na salt, 10 mM phosphocreatine, 0.2 mM EGTA, 2 mM MgCl<sub>2</sub>, 5 mM  
204 NaCl, 10 mM HEPES, 120 mM cesium methanesulfonate, 0.15% Neurobiotin, and 0.1 mM Alexa Fluor  
205 594 cadaverine or 0.1 mM Alexa Fluor 488 Na salt. All recordings were made using a Multiclamp 700B  
206 amplifier, the output of which was digitized at 10 kHz (Digidata 1440A). Series resistance was always <  
207 25 MΩ and was compensated up to 90%. Pharmacological agents included 50 μM AP5 (Tocris), 20 μM  
208 NBQX (Tocris), 10 μM Gabazine (Tocris), 5 μM atropine (Sigma), 100 μM mecamylamine (Sigma), and  
209 were bath applied for > 10 min before recordings were made. Neurons were targeted using differential  
210 interference contrast and epifluorescence when appropriate. Cell morphology was visualized after  
211 intracellular dialysis with fluorescent dye. ChR2-expressing axon terminals were stimulated by 10 ms  
212 laser pulses (gated by a Uniblitz shutter) of 473 nm laser (Shanghai Laser and Optics Century Company)  
213 delivered through a fiber optic directed at the recording site. Brain slices were histologically processed to  
214 visualize Neurobiotin-filled cells using streptavidin Alexa 488, 546, or 647. For experiments represented  
215 in Supplemental Figure 4, additional measures were taken to identify pyramidal cells and different classes  
216 of interneurons. First, potassium gluconate-containing intracellular solution was substituted for solution  
217 containing cesium and QX-314, in order to make recordings in current clamp configuration and  
218 characterize intrinsic electrophysiological properties of targeted neurons (Kawaguchi. 1993,1995).  
219 Second, targeted neurons were visualized by both intracellular diffusion of fluorescent dye, as well as  
220 streptavidin-Alexa Fluor processing. Third, glutamate decarboxylase (GAD65 and GAD67)  
221 immunohistochemistry was performed to characterize the neurotransmitter phenotype of Neurobiotin-  
222 labeled cells.

223

### 224 **In Vivo Intracellular Electrophysiology**

225 One to 7 days before physiology, mice were anesthetized with isoflurane and a custom titanium plate was  
226 attached to the skull with Metabond (Parkell), leaving ACtx exposed. For recording from awake mice,  
227 animals were acclimated to head fixation for several days. The day of recording, mice were briefly  
228 anesthetized with isoflurane, and a small craniotomy was made over ACtx, and mice were then allowed to  
229 recover for anesthesia. For recording from anesthetized mice, animals were anesthetized with three  
230 intraperitoneal injections of 20% urethane (9.5 ml/kg) separated by 30 min. A small craniotomy was then  
231 made over ACtx. Sharp borosilicate glass electrodes were fabricated with a horizontal puller (P-97,  
232 Sutter Instruments), and tips were filled with 3M K-acetate containing 5% Neurobiotin, resulting in  
233 electrode impedances ranging from 80 to 120 MΩ. An electrode was placed in an Axoclamp headstage  
234 (HS-2A) and was lowered vertically into the brain with a hydraulic manipulator (SD Instruments) until the  
235 tip penetrated a neuron. Intracellular signals were acquired with a Power 1401 using Spike 2 (Cambridge

236 Electronic Design), and used for further analysis only if the resting membrane potential was less than -50  
237 mV and was modulated by an auditory stimulus.

238

### 239 **In Vivo Extracellular Electrophysiology**

240 Preparatory surgical procedures and stimulus presentation were the same as for intracellular recordings  
241 in anesthetized head-fixed mice. One day before recording, a large craniotomy was made over ACtx,  
242 which was then covered with silicone elastomer (Kwik-Sil). On recording day, a 32-channel (4 x 8; 0.8 x  
243 0.8 mm recording area) multielectrode array (NeuroNexus) was lowered vertically into ACtx and allowed  
244 to rest for 30 min. The electrode array was connected directly to a digitizing headstage (Intan  
245 Technologies) via a 36-pin connector (Omnetics). Neural activity was referenced to an AgCl pellet  
246 implanted over contralateral somatosensory cortex. Voltage traces were filtered (300 to 5,000 Hz),  
247 digitized, and recorded (20 kHz per channel) for offline analysis. Putative action potentials were identified  
248 by voltage events crossing a threshold and individual neurons were sorted based on spike features using  
249 custom software.

250

### 251 **2 Photon Calcium Imaging**

252 Three to four weeks following the GCaMP6s injection, mice were anaesthetized with isoflurane and a  
253 custom, Y-shaped titanium plate was attached to the skull with Metabond. Mice were acclimated to head  
254 fixation for 1–5 days before the initial imaging session, and 30  $\mu$ L dexamethasone (4 mg/ml) was  
255 administered (intramuscularly) on the last acclimation day, 6–12 h before windowing. A rectangular  
256 craniotomy was then made over the injection site, and a laminated glass coverslip was placed over the  
257 craniotomy and sealed with Metabond. Animals were allowed to recover for 24 hours. Imaging was  
258 performed using a resonant scanning two-photon microscope (NeuroLabware) with a mode-locked  
259 titanium sapphire laser (Mai Tai DeepSee) at 920 nm. Images were acquired at 15.5 Hz with a 16x 0.8  
260 NA water-immersion objective (Nikon). Imaging was performed in low light conditions, with illumination  
261 only from an infrared light source. The mouse was free to move or rest on a non-motorized movable disc,  
262 rotations of which were monitored using a rotary encoder (U.S. Digital). A small infrared-sensitive video  
263 camera (Logitech) was positioned to monitor body movements. A GigE Vision camera (Dalsa) was used  
264 to monitor changes in pupil size at an acquisition rate synchronized to that of the microscope. GCaMP  
265 fluorescence images were registered to correct for movement artifact in the horizontal plane. Regions of  
266 interest (ROIs) were selected either by manually tracing around short, independent segments of axon, or  
267 by using semi-automated identification of nearby correlated pixel activity (Scanbox). For imaging SIn<sub>ACH</sub>  
268 axons,  $\Delta F/F$  was calculated using the mean fluorescence signal from 1-2 min of data acquisition as  
269 baseline. For imaging M2<sub>ACtx</sub> axons,  $\Delta F/F$  was calculated using a baseline value of the 30<sup>th</sup> percentile of  
270 fluorescence of each ROI (Petreanu et al., 2012).

271

272

273 **Movement and Pupil Size Tracking**

274 Video of body movements and acquired 2p images were synchronized post hoc using an aperiodic train  
275 of digital pulses that was simultaneously sent to the camera and microscope. Body movements were  
276 detected offline using ROIs drawn around the head (including mouth, nose, and whiskers), forelimbs, and  
277 treadmill perimeter, as well as a red LED used to synchronize video and 2p data. Within each ROI, the  
278 average change in pixel intensity was calculated across video frames as a measure of movement. Pupil  
279 size was similarly quantified by measuring the change in average pixel intensity within an ROI drawn  
280 around the eye. Because there was substantial reflected and emitted infrared light, the pupil was easily  
281 visualized, with increases in pupil size corresponding to increased brightness within the eye ROI. Pupil  
282 area traces were low-pass filtered to remove movement artifacts, which were clearly distinguishable from  
283 both slow and fast pupil dilations and constrictions.

284

285 **Histology and Confocal Microscopy**

286 Mice were deeply anaesthetized with sodium pentobarbital (250 mg/kg, intraperitoneally) and  
287 transcardially perfused with phosphate buffered saline (PBS) followed by 4% cold  
288 paraformaldehyde. Brains were post-fixed overnight in 4% paraformaldehyde containing 30%  
289 sucrose. Brains were blocked in Optimum Cutting Temperature compound (Tissue-Tek), and 50  $\mu$ m  
290 coronal sections were cut on a sliding freezing microtome. Brain slices were first rinsed in PBS for 10  
291 min, then in two washes of PBS containing 0.3% Triton X-100 (PBST) for 20 min. Slices were then  
292 incubated in PBST with 10% Blocking One blocking buffer (Nacalai Tesque) for 1 h at room  
293 temperature. Immunostaining was performed with primary antibodies of rabbit anti-GFP (1:1,000;  
294 Abcam), goat anti-ChAT (1:1000; Millipore), mouse anti-PV (1:1,000; Swant), mouse anti-NeuN (1:100;  
295 Millipore), rabbit anti-VIP (1:1000; Immunostar), rabbit anti-NPY (1:1000; Abcam), rabbit anti-5HT  
296 (1:1000; Millipore), rabbit anti-DBH (1:1000; Millipore), rabbit anti-GAD65/67 (1:1,000; Abcam), or rabbit  
297 anti-SST (1:1000; Santa Cruz) for 2-3 nights at 4°C. After three washes of 10 min in PBS, slices were  
298 incubated in secondary antibodies from Jackson Immunoresearch at a concentration of 1:1000 in PBST  
299 containing 10% blocking buffer overnight at 4°C. To label nicotinic acetylcholine receptors in a subset of  
300 experiments,  $\alpha$ -bungarotoxin conjugated to Alexa Fluor 647 (1:1000, Molecular Probes) was  
301 included. Sections were washed several times in PBS, incubated in PBS containing DAPI for 30 min for a  
302 subset of experiments, rinsed again, and mounted. For visualizing Neurobiotin cell fills, permeabilized 75  
303  $\mu$ m sections were incubated overnight in PBST containing streptavidin Alexa 546, 488, or 647. Images  
304 were acquired with a Zeiss 710 LSM inverted confocal microscope using 10x, 20x, 60x oil immersion, or  
305 100x oil immersion objectives. For high magnification imaging of axons, optical sections of 1 or fewer  
306 Airy units using a 100x 1.4 NA objective were acquired. All image processing was performed in  
307 ImageJ. For presentation, some images were median filtered with a window radius of one  
308 pixel. Additionally, a subset of Z stacks underwent 3D interpolation with a resampling factor of one (3D  
309 Viewer, Image J) to permit rotated views of images.

## 310 **Data Analysis**

311 All data analyses were performed in Matlab. For all statistical tests, significance was measured against  
312 an alpha of 0.05. To calculate the relative location of SIn cell bodies in rabies-based presynaptic labeling  
313 experiments, the mediolateral and dorsoventral coordinates of each neuron from two brains for each  
314 genotype were measured relative to the midline near fasciola cinerea, or the most medial point of CA1 of  
315 hippocampus. The rostrocaudal location of each brain section was indexed by measuring the  
316 mediolateral length of hippocampus, which progressively increased for caudal sections. Then, the  
317 coordinates were normalized to the width and height of each section to account for variability in brain  
318 size. For brain slice electrophysiology, peak current was measured from an average of 4 or 8 stimulus  
319 trials within a response window of 2 seconds after stimulus onset. Conservative estimates of onset times  
320 for excitatory and inhibitory currents were calculated by finding the times at which those currents deviated  
321 from 2.5 times the standard deviation of the pre-stimulus baseline period. For in vivo intracellular  
322 experiments, voltage area evoked for each neuron was calculated for each of 20 (light stimulus or blank  
323 stimulus alone) or 40 (tone + light stimulus) trials within a 2 second window after stimulus onset. For  
324 multielectrode data, individual unit responses were included for analysis if they were significantly driven  
325 by stimulus presentation in both laser off and laser on conditions. Response strength (RS), in units of  
326 spikes/s, was calculated from a 100 ms window after tone onset relative to a 200 ms baseline period  
327 before any stimulus presentation. Peristimulus time histograms were calculated by smoothing the action  
328 potential firing rate over a 20 ms window. Population tuning curves were created by normalizing the tone  
329 response of each isolated unit to its peak response. Those same normalization criteria were then applied  
330 to those units' responses to tone presentation with concurrent light presentation. The tuning curves of  
331 each normalized, isolated unit were then aligned to produce a peak of 1 at the preferred tone frequency.  
332 Normalized response strength for each tone ( $\pm 0, 1, 2,$  and  $3$  octaves relative to the preferred frequency)  
333 were plotted against the normalized response strength for each tone with light presentation, and a line  
334 was fit to these data points. To calculate time constants for currents evoked in dual optogenetic  
335 experiments, exponentials were fit to the onset and offset of each of 5 neurons' evoked excitatory current  
336 before and after application of receptor blockers.  $\tau_{\text{On}}$  was calculated by fitting an exponential from  
337 baseline to the peak evoked current.  $\tau_{\text{Off}}$  was calculated by fitting an exponential from peak evoked  
338 current back to baseline. For calcium imaging experiments, periods of movement were identified by  
339 setting a threshold for each body ROI and treadmill ROI. Mean fluorescence was then calculated for 500  
340 ms windows 1 s before and 1 s after movement onset. To calculate lags between movement and pupil or  
341 axon fluorescence traces, the peak cross correlation coefficients within a  $\pm 2$  s window were calculated  
342 and averaged across multiple ROIs and movement epochs from several mice. Mean axon fluorescence  
343 and pupil size were aligned to both movement onset and movement offset.

344



345 **Supplemental References**

346

347 Kawaguchi, Y. (1993). Groupings of Nonpyramidal and Pyramidal Cells with Specific Physiological and  
348 Morphological-Characteristics in Rat Frontal-Cortex. *Journal of neurophysiology* 69, 416-431.

349

350 Kawaguchi, Y. (1995). Physiological Subgroups of Nonpyramidal Cells with Specific Morphological-  
351 Characteristics in Layer II/III of Rat Frontal-Cortex. *J Neurosci* 15, 2638-2655.

352

353 Petreanu, L., Gutnisky, D.A., Huber, D., Xu, N.L., O'Connor, D.H., Tian, L., Logger, L., and Svoboda, K.  
354 (2012). Activity in motor-sensory projections reveals distributed coding in somatosensation. *Nature* 489,  
355 299-303.

356

357 Unal, C.T., Golowasch, J.P., and Zaborszky, L. (2012). Adult mouse basal forebrain harbors two distinct  
358 cholinergic populations defined by their electrophysiology. *Frontiers in Behavioral Neuroscience* 6, 21.
